# Supplementary material for: Ultrafast end-to-end protein structure prediction enables high-throughput exploration of uncharacterized proteins
Source: PubMed Central journal article supplement — Proc Natl Acad Sci U S A. 2022 Jan 24;119(4):e2113348119. doi: 10.1073/pnas.2113348119 (PMC8795500; doi:10.1073/pnas.2113348119), 2022-01-24
Supplement: pnas.2113348119.sapp.pdf [file pnas.2113348119.sapp.pdf]

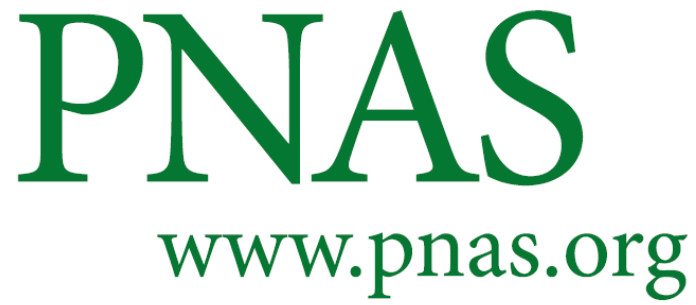

**Supplementary Information for**

Ultrafast end-to-end protein structure prediction enables high-throughput exploration of uncharacterised proteins

Shaun M. Kandathil, Joe G. Greener, Andy M. Lau and David T. Jones

Correspondence to: David T. Jones

Email: [d.t.jones@ucl.ac.uk](mailto:d.t.jones@ucl.ac.uk)

**This PDF file includes:**

Figures S1 to S7  
Tables S1 to S5

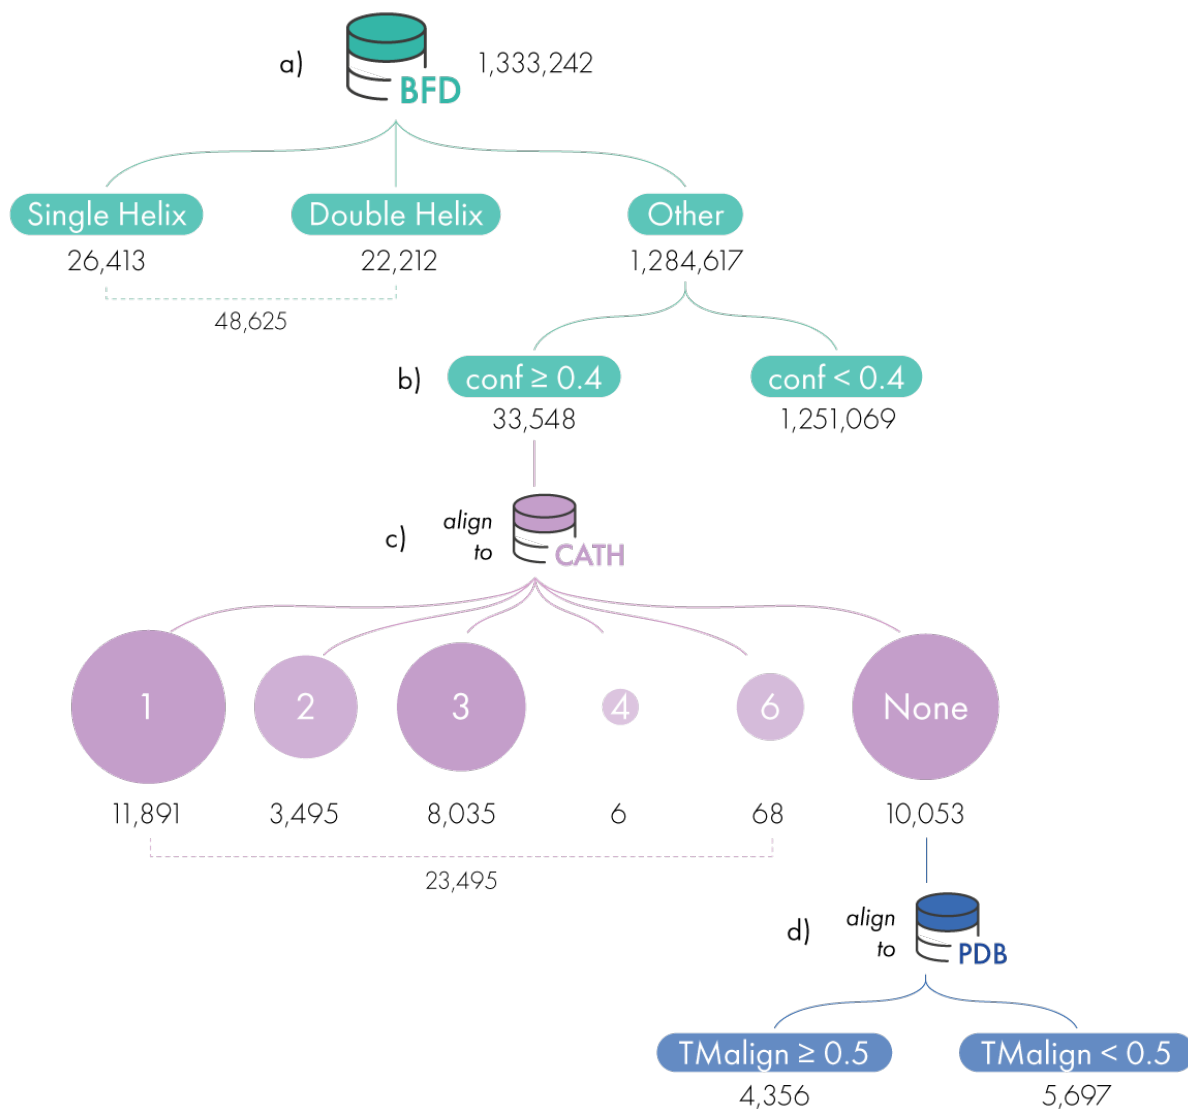

**Figure S1. Filtering of BFD models.** **a)** Models with folds corresponding to single and double helices were filtered from the ensemble to leave only complex folds. **b)** A confidence threshold of  $\geq 0.4$  was applied to isolate models likely to be correct. **c)** Each model was searched against known CATH domains. Models which matched CATH domains with a TM-score  $\geq 0.5$  calculated using TM-align were assigned to the corresponding CATH classes 1-4 and 6. **d)** The remaining ensemble not matched to CATH were searched against a representative set of PDB chains. The number of models at each stage of filtering is represented by the value proximal to each node.

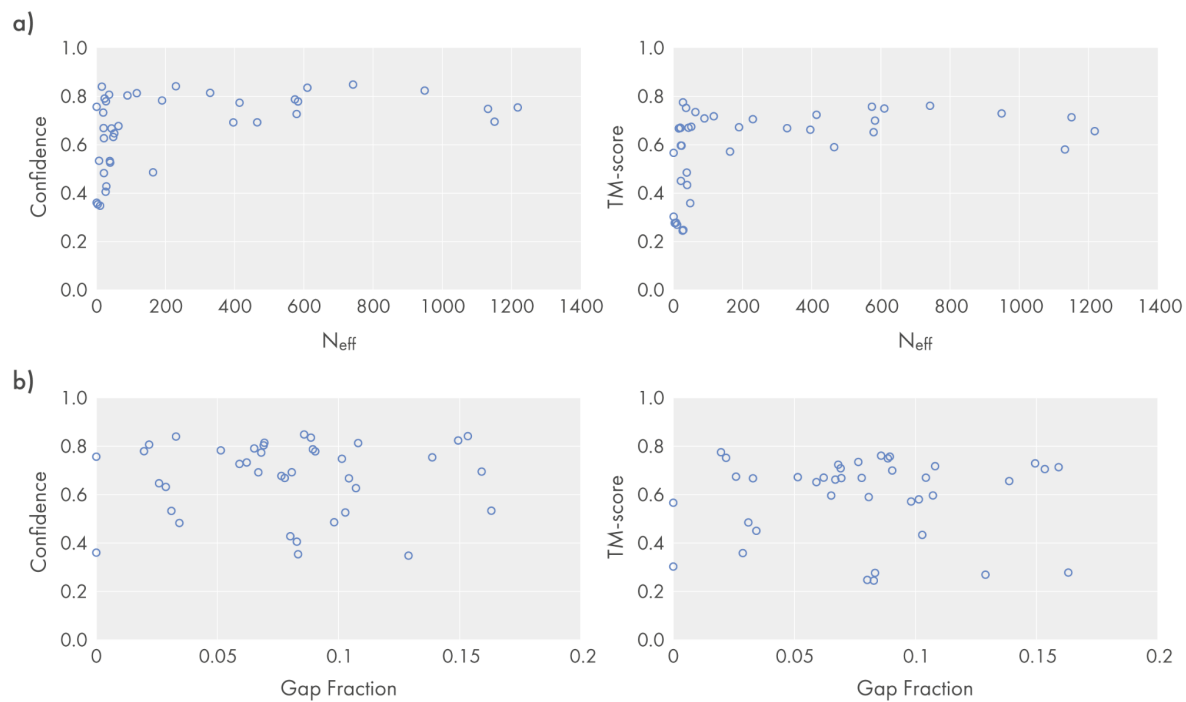

**Figure S2. Effect of alignment quality metrics on network-predicted confidence score and TM-score.** a) Effective sequence count ( $N_{\text{eff}}$ ) and b) gap fraction is plot against confidence and TM-scores for 39 CASP13 FM and FM/TBM domains.

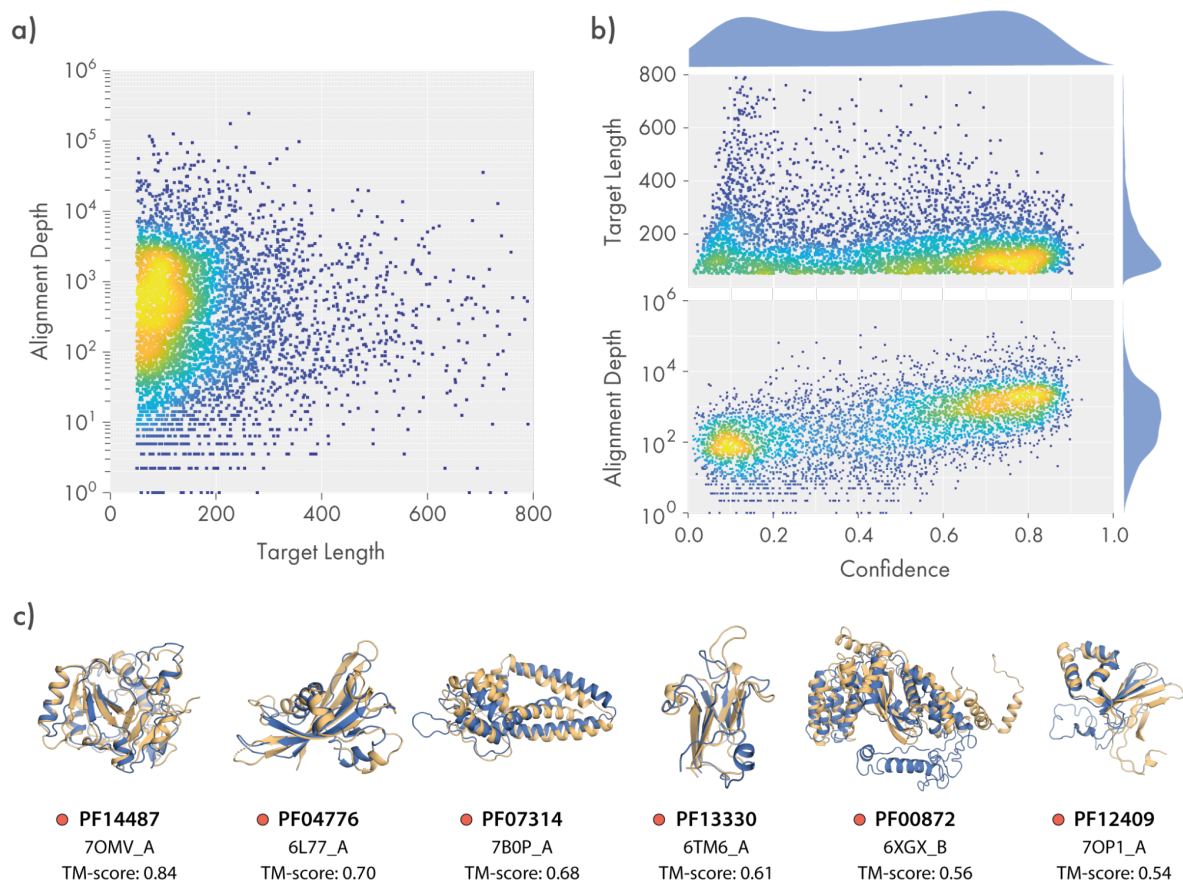

**Figure S3. Pfam models generated by DMPfold2.** Data represents 4,938 models from Pfam (version 32) generated from alignments used in DMPfold1. **a)** Summary of target length and alignment depth of 4,938 models. **b)** Distributions of model confidence against target length and alignment depth. Of the models generated, 1,988 (40.3%) and 2,950 (59.7%) have a confidence  $< 0.4$  and  $\geq 0.4$  respectively. Color gradients indicate the density, with yellow and dark blue indicating highest and lowest respectively. **c)** Examples of DMPfold2 models for very hard targets. The mean TM-score across the shown targets are 0.655 for DMPfold2 and 0.564 for C-I-TASSER. Native structures and models are shown in orange and blue respectively.

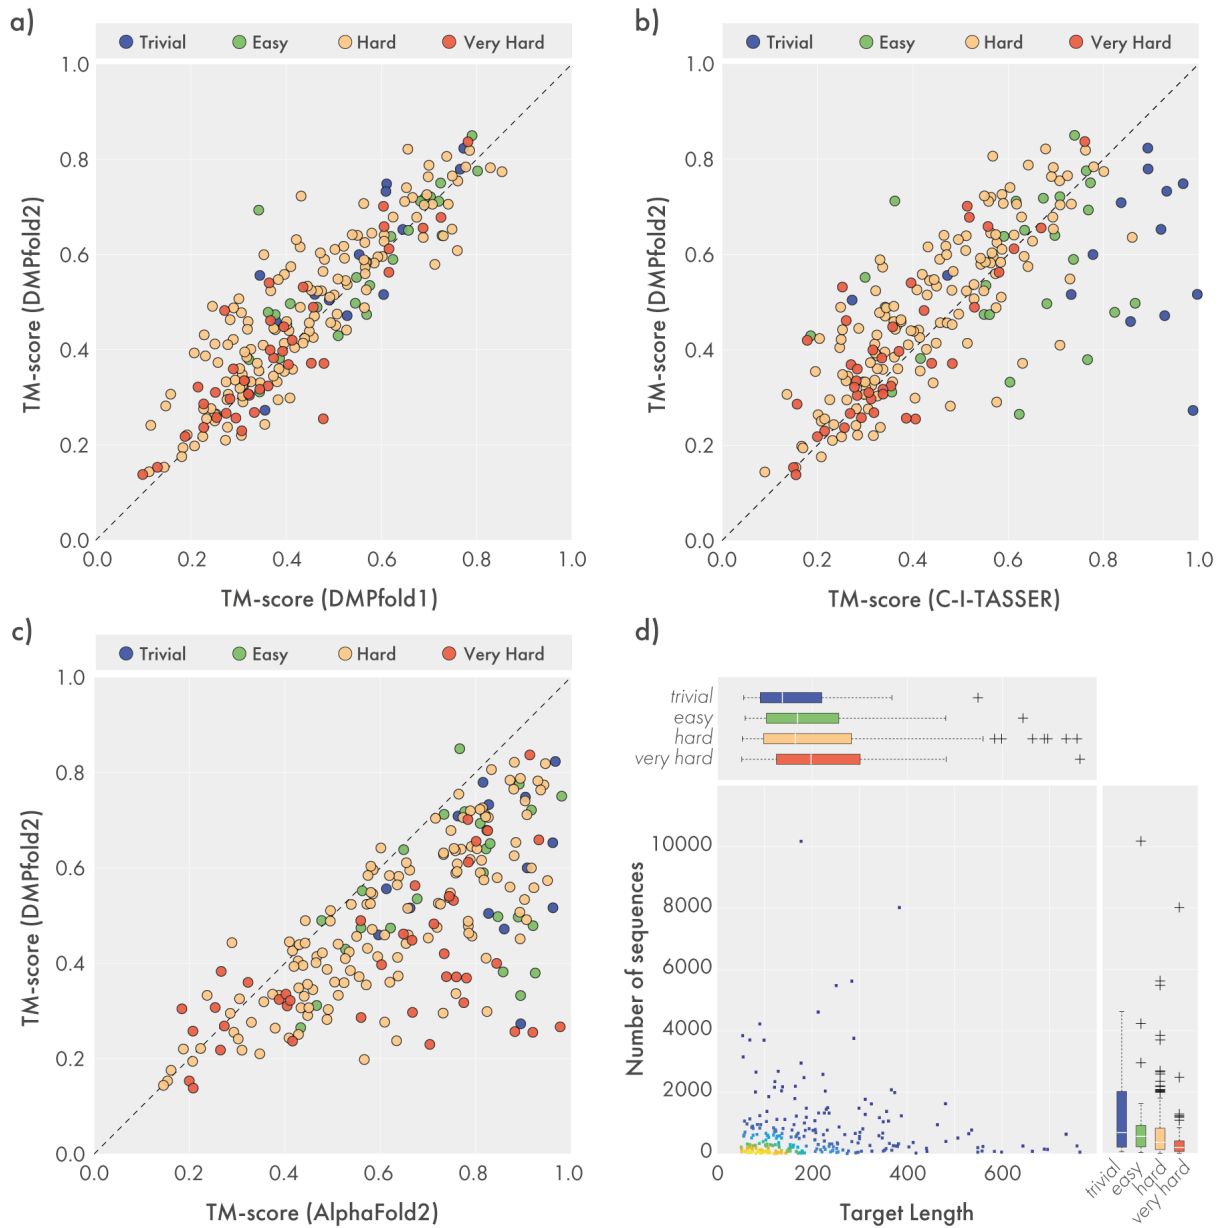

**Figure S4.** a-c) Comparison of Pfam families with recent structural annotations modelled by DMPfold1, DMPfold2, C-I-TASSER and AlphaFold. The colour of each data point represents the target difficulty as reported in the C-I-TASSER study (22) Only a common subset of 221 targets between all four methods were included. 34 targets were either not modelled in the original DMPfold1 publication or overlapped with the AlphaFold2 training set and were removed. A detailed list of TM-scores obtained by each method, difficulty and target can be found in Table S3 and S4. d) Distribution of target length and number of sequences in the alignment. Box plots show distributions when separated by difficulty classes.

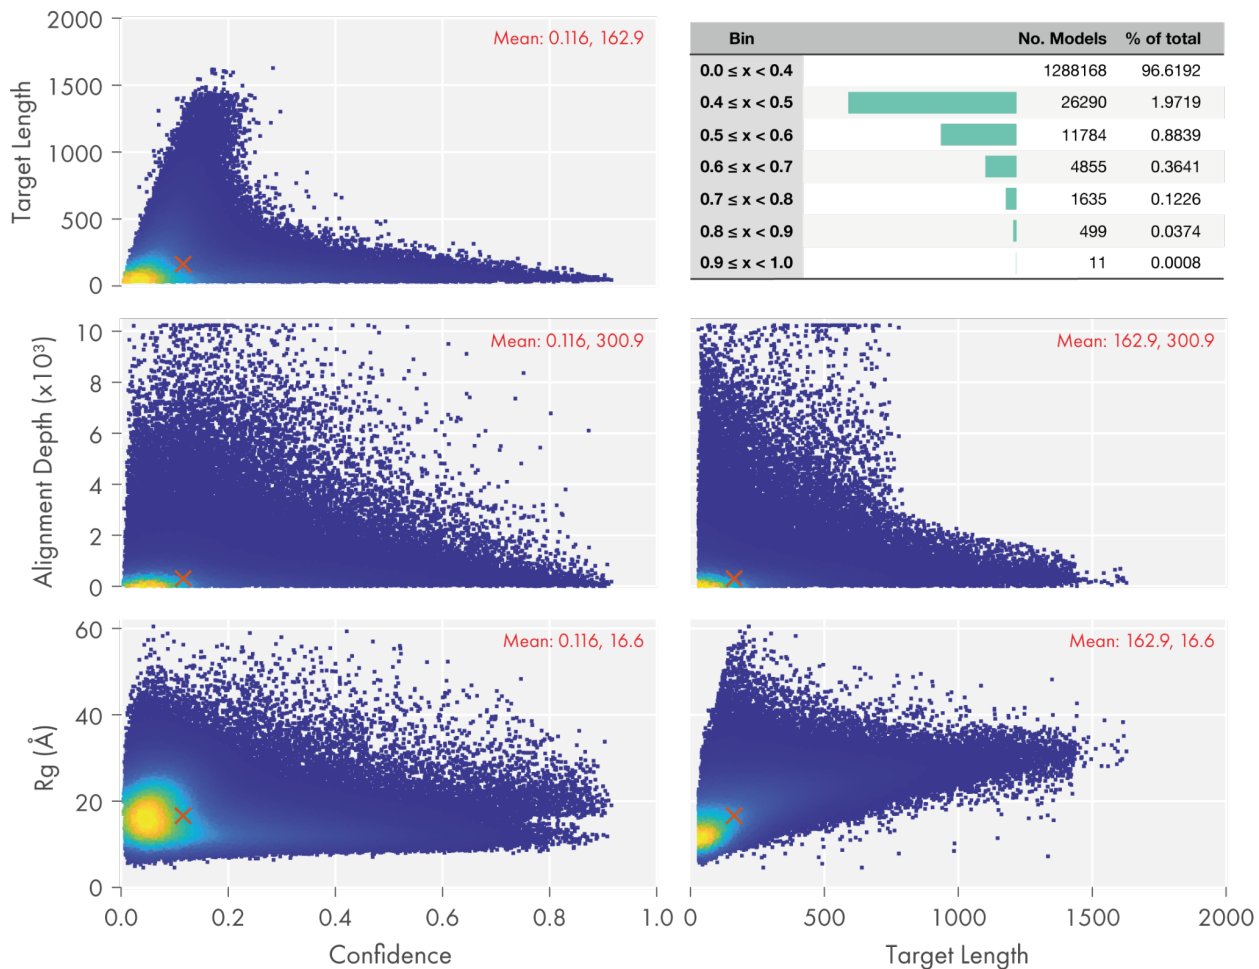

**Figure S5. Summary of 1.3 million BFD models.** Comparison of target length, alignment depth, radius of gyration (Rg) and model confidence for 1.3 million models. The red 'x' marks the mean of each variable, with the numerical values shown in the top right hand corner of each subplot. The table shows the number of models in each confidence bin. Color gradients indicate the density of datapoints, with yellow and dark blue indicating highest and lowest respectively.

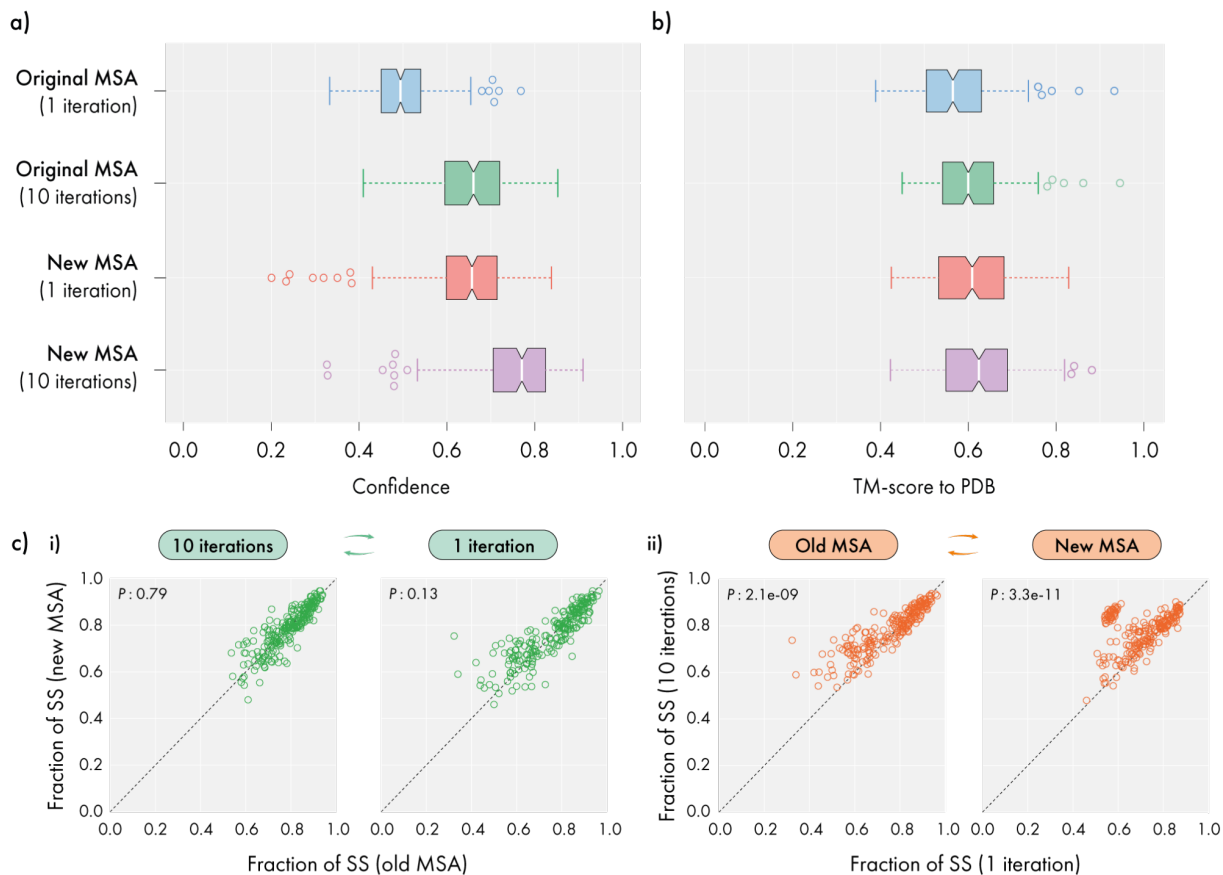

**Figure S6. Effect of alignment regeneration and iterative modelling procedure.** The models of 225 BFD targets were regenerated to assess the effect of improving the alignment and/or running the end-to-end procedure with 1 or 10 iterations. Box-and-whisker plot of **a)** confidence scores obtained from four different model generation schemes and **b)** the highest TM-score obtained between generated models and the closest match in a PDB representative set. **c)** Effect of modelling strategy on model secondary structure content. The fraction of secondary structure was calculated as the total number of residues assigned to the DSSP classes G, H, I, E, B, T or S (i.e. all classes excluding loop/irregular assignments), normalised by the target length. Values in each subplot represent the p-value as determined via a paired t-test.

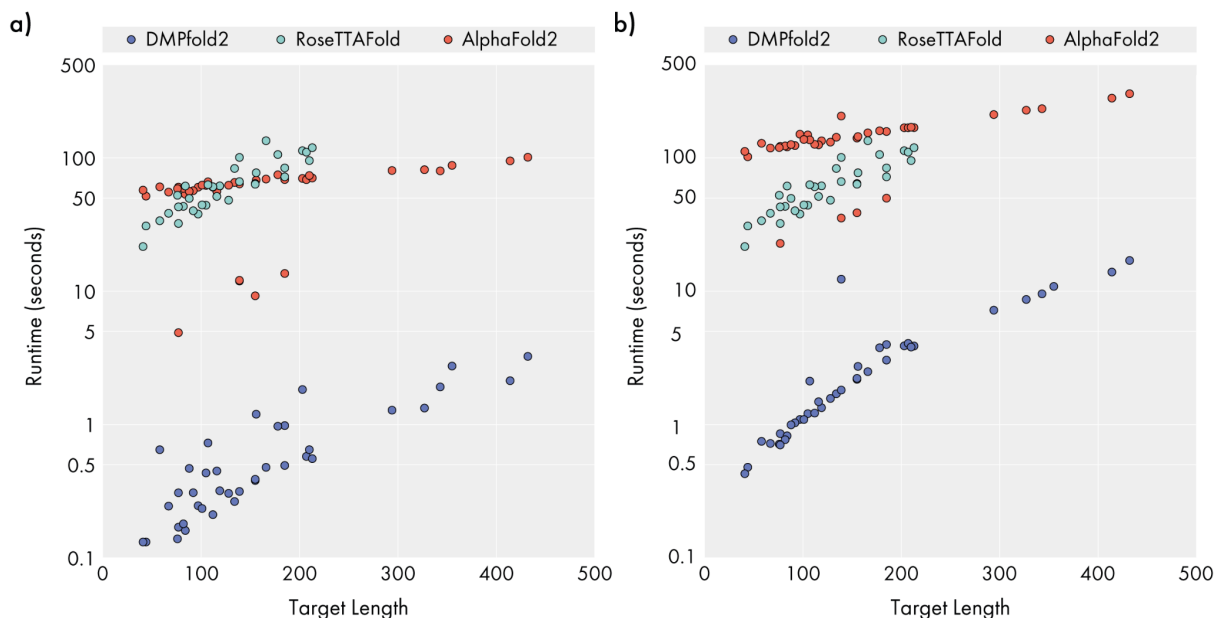

**Figure S7.** Runtimes on 39 CASP13 domains, comparing DMPfold2, RoseTTAFold and AlphaFold2, after a) 1 iteration and b) the default number of iterations of each method. DMPfold2 runs 10 iterations by default, RoseTTAFold's refinement module runs until convergence, and AlphaFold2 runs 3 iterations. All predictions were run using identical MSAs on a single NVIDIA GTX 1080Ti GPU. The largest six targets are omitted for RoseTTAFold due to memory limitations. DMPfold2 is roughly 2 orders of magnitude faster than AlphaFold2 when running a single iteration.



**Table S1.** Model accuracy on the 39 FM and FM/TBM CASP13 domains, comparing models built using either DMPfold1 or DMPfold2. In the case of DMPfold1, only the top-ranking model selected by each modelling run was evaluated for each target.

| Target     | DMPfold1 |        |          | DMPfold2 |        |          |
|------------|----------|--------|----------|----------|--------|----------|
|            | GDT_HA   | GDT_TS | TM-Score | GDT_HA   | GDT_TS | TM-Score |
| T0949-D1   | 36.434   | 54.845 | 0.626    | 40.310   | 62.984 | 0.720    |
| T0950-D1   | 24.342   | 40.863 | 0.610    | 19.956   | 35.526 | 0.578    |
| T0953s1-D1 | 25.373   | 44.030 | 0.376    | 33.209   | 47.388 | 0.434    |
| T0953s2-D1 | 23.295   | 34.659 | 0.256    | 45.455   | 65.909 | 0.451    |
| T0955-D1   | 41.463   | 52.439 | 0.415    | 56.098   | 74.390 | 0.591    |
| T0957s2-D1 | 36.774   | 58.226 | 0.690    | 31.129   | 51.613 | 0.615    |
| T0958-D1   | 50.974   | 70.779 | 0.704    | 47.727   | 68.506 | 0.668    |
| T0960-D2   | 38.690   | 57.143 | 0.564    | 15.179   | 24.405 | 0.249    |
| T0963-D2   | 41.463   | 59.451 | 0.584    | 15.549   | 26.829 | 0.250    |
| T0968s1-D1 | 46.186   | 67.373 | 0.742    | 41.102   | 62.924 | 0.718    |
| T0968s2-D1 | 41.957   | 63.696 | 0.721    | 41.522   | 63.913 | 0.694    |
| T0969-D1   | 19.986   | 37.641 | 0.633    | 25.989   | 45.056 | 0.697    |
| T0970-D1   | 40.000   | 58.529 | 0.596    | 45.294   | 65.000 | 0.669    |
| T0975-D1   | 19.217   | 33.185 | 0.507    | 24.555   | 43.683 | 0.653    |
| T0978-D1   | 18.765   | 35.472 | 0.584    | 21.065   | 41.223 | 0.662    |
| T0980s1-D1 | 18.750   | 30.288 | 0.310    | 21.875   | 33.654 | 0.356    |
| T0981-D3   | 28.941   | 48.399 | 0.642    | 36.576   | 57.759 | 0.735    |
| T0986s1-D1 | 47.011   | 68.750 | 0.726    | 39.402   | 61.141 | 0.662    |
| T0986s2-D1 | 12.419   | 22.419 | 0.311    | 35.323   | 57.742 | 0.716    |
| T0987-D1   | 22.568   | 40.676 | 0.547    | 31.216   | 53.108 | 0.687    |
| T0987-D2   | 23.597   | 38.903 | 0.520    | 25.893   | 43.750 | 0.576    |
| T0989-D1   | 24.440   | 37.500 | 0.443    | 9.701    | 19.590 | 0.244    |
| T0989-D2   | 16.071   | 29.464 | 0.340    | 11.607   | 23.214 | 0.277    |
| T0990-D1   | 44.408   | 65.461 | 0.611    | 52.961   | 74.013 | 0.745    |
| T0990-D3   | 11.502   | 19.601 | 0.290    | 19.366   | 32.746 | 0.477    |
| T0992-D1   | 50.467   | 72.430 | 0.773    | 48.364   | 69.860 | 0.761    |

|             |        |        |       |        |        |       |
|-------------|--------|--------|-------|--------|--------|-------|
| T0997-D1    | 36.216 | 58.243 | 0.722 | 38.378 | 60.811 | 0.761 |
| T0998-D1    | 10.843 | 18.825 | 0.269 | 13.554 | 21.988 | 0.282 |
| T1000-D2    | 27.785 | 46.807 | 0.700 | 28.736 | 49.660 | 0.750 |
| T1001-D1    | 28.237 | 46.763 | 0.560 | 35.072 | 57.374 | 0.672 |
| T1005-D1    | 21.472 | 39.034 | 0.613 | 27.607 | 47.469 | 0.706 |
| T1008-D1    | 19.481 | 27.597 | 0.266 | 24.026 | 37.338 | 0.304 |
| T1010-D1    | 41.190 | 58.810 | 0.711 | 32.024 | 51.190 | 0.672 |
| T1015s1-D1  | 27.273 | 42.898 | 0.452 | 34.659 | 54.261 | 0.559 |
| T1017s2-D1  | 27.600 | 43.400 | 0.502 | 39.800 | 61.800 | 0.733 |
| T1019s1-D1  | 33.621 | 53.879 | 0.433 | 49.569 | 70.259 | 0.652 |
| T1021s3-D1  | 27.410 | 45.783 | 0.576 | 35.843 | 55.271 | 0.664 |
| T1021s3-D2  | 13.918 | 26.031 | 0.287 | 50.258 | 72.423 | 0.775 |
| T1022s1-D1  | 23.878 | 39.904 | 0.508 | 30.449 | 49.199 | 0.594 |
| <b>Mean</b> | 29.334 | 45.902 | 0.531 | 32.728 | 51.153 | 0.590 |

**Table S2.** Precision, recall and F1-score at different confidence thresholds. The confidence threshold that achieves the highest F1-score is shown in bold.

| Confidence Threshold | Precision | Recall | F1-score |
|----------------------|-----------|--------|----------|
| 0.0                  | 0.612     | 1.000  | 0.759    |
| 0.1                  | 0.634     | 0.987  | 0.772    |
| 0.2                  | 0.698     | 0.962  | 0.809    |
| 0.3                  | 0.727     | 0.923  | 0.814    |
| 0.4                  | 0.810     | 0.872  | 0.840    |
| 0.5                  | 0.853     | 0.782  | 0.816    |
| 0.6                  | 0.935     | 0.647  | 0.765    |
| 0.7                  | 0.986     | 0.436  | 0.604    |
| 0.8                  | 1.000     | 0.141  | 0.247    |

**Table S3.** Summary of model accuracy by target class for 221 Pfam targets comparing DMPfold1, DMPfold2, C-I-TASSER and AlphaFold2. Only targets which were common between all four methods were included. 34 targets were either not modelled by DMPfold1 or overlapped with the AlphaFold2 training set and were removed.

|            |     | Mean TM-score |          |            |            |
|------------|-----|---------------|----------|------------|------------|
| Difficulty | n   | DMPfold1      | DMPfold2 | C-I-TASSER | AlphaFold2 |
| Trivial    | 14  | 0.5578        | 0.5959   | 0.8192     | 0.8260     |
| Easy       | 26  | 0.5410        | 0.5596   | 0.6037     | 0.7490     |
| Hard       | 141 | 0.4402        | 0.4828   | 0.4412     | 0.6203     |
| Very hard  | 40  | 0.3829        | 0.3954   | 0.3603     | 0.5987     |
|            |     |               |          |            |            |
| Total      | 221 | 0.4491        | 0.4832   | 0.4696     | 0.6445     |

**Table S4.** TM-scores for 255 Pfam models generated by DMPfold1, DMPfold2, C-I-TASSER and AlphaFold2.

| Target  | Difficulty | TM-score              |          |            |                         |
|---------|------------|-----------------------|----------|------------|-------------------------|
|         |            | DMPfold1 <sup>a</sup> | DMPfold2 | C-I-TASSER | AlphaFold2 <sup>b</sup> |
| PF00810 | trivial    | 0.7404                | 0.7058   | 0.7326     | 0.8267                  |
| PF00811 | trivial    | 0.8533                | 0.7740   | 0.8007     | 0.9432                  |
| PF01718 | trivial    | 0.5690                | 0.4742   | 0.5496     | 0.5595                  |
| PF02405 | trivial    | 0.3332                | 0.2684   | 0.3186     | 0.2730                  |
| PF04064 | trivial    | 0.6160                | 0.6120   | 0.6124     | 0.7847                  |
| PF04727 | trivial    | 0.5645                | 0.4885   | 0.5747     | 0.4952                  |
| PF05938 | trivial    | 0.1437                | 0.1533   | 0.1549     | 0.1540                  |
| PF06995 | trivial    | 0.3218                | 0.3795   | 0.7666     | 0.9251                  |
| PF08366 | trivial    | 0.7302                | 0.6393   | 0.5121     | 0.7697                  |
| PF08742 | trivial    | 0.7398                | 0.6902   | 0.9980     | -                       |
| PF09447 | trivial    | 0.7484                | 0.6534   | 0.6948     | 0.8844                  |
| PF09564 | trivial    | 0.6057                | 0.6280   | 0.6512     | 0.7328                  |
| PF09856 | trivial    | 0.4355                | 0.4141   | 0.4491     | 0.4670                  |
| PF10664 | trivial    | 0.1470                | 0.2821   | 0.4788     | 0.4883                  |
| PF10716 | trivial    | 0.3531                | 0.5998   | 0.4711     | 0.9170                  |
| PF11909 | trivial    | 0.3961                | 0.3547   | 0.1958     | 0.5707                  |
| PF12534 | trivial    | 0.3789                | 0.4594   | 0.8568     | 0.5964                  |
| PF13839 | trivial    | 0.5499                | 0.6402   | 0.4654     | 0.8031                  |
| PF14065 | trivial    | 0.8289                | 0.7824   | 0.6948     | 0.9305                  |
| PF14416 | trivial    | 0.3745                | 0.3816   | 0.4419     | -                       |
| PF02049 | easy       | 0.6449                | 0.6528   | 0.9206     | 0.9618                  |
| PF03155 | easy       | 0.4904                | 0.5045   | 0.2728     | 0.8271                  |
| PF03189 | easy       | 0.6158                | 0.5628   | 0.5810     | 0.6729                  |
| PF03542 | easy       | 0.5088                | 0.5486   | 0.7298     | 0.5803                  |

|         |      |        |        |        |        |
|---------|------|--------|--------|--------|--------|
| PF04766 | easy | 0.2757 | 0.2954 | 0.2260 | 0.7319 |
| PF05018 | easy | 0.5851 | 0.5822 | 0.5634 | 0.6386 |
| PF05107 | easy | 0.2421 | 0.2766 | 0.2818 | 0.6093 |
| PF05273 | easy | 0.4528 | 0.3718 | 0.4396 | 0.7387 |
| PF05332 | easy | 0.3555 | 0.2730 | 0.9878 | 0.8946 |
| PF05982 | easy | 0.2075 | 0.1981 | 0.1670 | 0.5666 |
| PF06086 | easy | 0.3960 | 0.4138 | 0.5145 | 0.5946 |
| PF06478 | easy | 0.6819 | 0.7123 | 0.3624 | 0.7339 |
| PF06886 | easy | 0.2774 | 0.4107 | 0.3904 | 0.8220 |
| PF08345 | easy | 0.3926 | 0.3970 | 0.3711 | 0.6027 |
| PF08906 | easy | 0.4046 | 0.3691 | 0.2705 | 0.7809 |
| PF09345 | easy | 0.7729 | 0.8232 | 0.8929 | 0.9673 |
| PF09767 | easy | -      | 0.2861 | 0.3145 | 0.2903 |
| PF12031 | easy | 0.6568 | 0.6509 | 0.6345 | 0.8304 |
| PF12333 | easy | 0.2528 | 0.2650 | 0.6234 | 0.4332 |
| PF12509 | easy | -      | 0.4378 | 0.3640 | 0.4887 |
| PF13280 | easy | 0.6999 | 0.7876 | 0.6423 | 0.8939 |
| PF13553 | easy | 0.3676 | 0.5239 | 0.3223 | 0.7263 |
| PF14430 | easy | 0.6057 | 0.6587 | 0.5579 | 0.9326 |
| PF14772 | easy | 0.2741 | 0.2666 | 0.2687 | 0.9774 |
| PF15430 | easy | 0.3207 | 0.3072 | 0.3376 | 0.2538 |
| PF15674 | easy | 0.5268 | 0.4414 | 0.4125 | 0.6541 |
| PF16495 | easy | 0.7272 | 0.6399 | 0.6981 | 0.8219 |
| PF17166 | easy | 0.3849 | 0.3603 | 0.3687 | 0.6202 |
| PF01151 | hard | 0.1189 | 0.1382 | 0.1062 | -      |
| PF01366 | hard | 0.5652 | 0.6254 | 0.5765 | 0.8809 |
| PF01578 | hard | 0.4742 | 0.5238 | 0.5490 | 0.5718 |
| PF01673 | hard | 0.4214 | 0.6313 | 0.4957 | 0.7328 |

|         |      |        |        |        |        |
|---------|------|--------|--------|--------|--------|
| PF01763 | hard | 0.2890 | 0.3598 | 0.2836 | 0.3227 |
| PF01803 | hard | 0.0986 | 0.1381 | 0.1550 | 0.2077 |
| PF02106 | hard | 0.2783 | 0.3066 | 0.2986 | 0.4338 |
| PF03311 | hard | 0.3516 | 0.4098 | 0.7087 | 0.5267 |
| PF03348 | hard | 0.5659 | 0.5735 | 0.3368 | 0.9509 |
| PF03511 | hard | 0.6096 | 0.7327 | 0.9326 | 0.8276 |
| PF03581 | hard | 0.2513 | 0.3105 | 0.3077 | 0.4048 |
| PF03586 | hard | 0.3060 | 0.4780 | 0.3304 | 0.7847 |
| PF03609 | hard | 0.3834 | 0.5475 | 0.4448 | 0.7471 |
| PF03613 | hard | 0.6556 | 0.8215 | 0.6786 | 0.8813 |
| PF03626 | hard | 0.7773 | 0.7840 | 0.7795 | 0.8721 |
| PF03963 | hard | 0.4297 | 0.4893 | 0.2487 | 0.4429 |
| PF04031 | hard | 0.3117 | 0.3352 | 0.2816 | 0.4021 |
| PF04061 | hard | 0.6875 | 0.6557 | 0.6693 | 0.8011 |
| PF04109 | hard | 0.7853 | 0.8187 | 0.7623 | 0.9463 |
| PF04112 | hard | 0.4134 | 0.3591 | 0.3373 | 0.5241 |
| PF04143 | hard | 0.6899 | 0.7041 | 0.7091 | 0.7159 |
| PF04213 | hard | -      | 0.4227 | 0.6465 | 0.6580 |
| PF04277 | hard | 0.3077 | 0.3483 | 0.2528 | 0.4290 |
| PF04463 | hard | 0.6897 | 0.7087 | 0.8371 | 0.7629 |
| PF04571 | hard | 0.4086 | 0.4969 | 0.6812 | 0.8894 |
| PF04577 | hard | 0.6043 | 0.7014 | 0.5143 | 0.7838 |
| PF04660 | hard | 0.6656 | 0.7198 | 0.5641 | 0.7890 |
| PF04718 | hard | 0.7244 | 0.7504 | 0.7727 | 0.9805 |
| PF04819 | hard | 0.7031 | 0.7212 | 0.7086 | 0.9171 |
| PF05241 | hard | 0.6879 | 0.6359 | 0.8603 | 0.7577 |
| PF05320 | hard | -      | 0.4178 | 0.5999 | 0.9469 |
| PF05615 | hard | 0.2278 | 0.4313 | 0.3248 | 0.5732 |

|         |      |        |        |        |        |
|---------|------|--------|--------|--------|--------|
| PF05680 | hard | 0.5093 | 0.4295 | 0.1858 | 0.5272 |
| PF05751 | hard | 0.3671 | 0.4614 | 0.2605 | 0.6487 |
| PF05914 | hard | 0.1296 | 0.1532 | 0.1497 | 0.1995 |
| PF06022 | hard | 0.3067 | 0.2298 | 0.2152 | 0.7040 |
| PF06098 | hard | 0.2069 | 0.3934 | 0.3211 | 0.4191 |
| PF06101 | hard | 0.3771 | 0.4423 | 0.2526 | 0.4424 |
| PF06333 | hard | 0.1122 | 0.1439 | 0.0897 | 0.1454 |
| PF06417 | hard | -      | 0.0581 | 0.0658 | 0.0667 |
| PF06466 | hard | 0.1156 | 0.2414 | 0.2809 | 0.3021 |
| PF06578 | hard | 0.7008 | 0.7114 | 0.9152 | -      |
| PF06664 | hard | 0.3423 | 0.6934 | 0.7683 | 0.8096 |
| PF06760 | hard | 0.5673 | 0.5838 | 0.5844 | 0.6193 |
| PF06761 | hard | 0.5452 | 0.4978 | 0.8665 | 0.8468 |
| PF07019 | hard | 0.1574 | 0.3067 | 0.1360 | 0.4503 |
| PF07426 | hard | 0.2466 | 0.2476 | 0.2668 | -      |
| PF07580 | hard | 0.3663 | 0.3997 | 0.3163 | 0.8441 |
| PF07812 | hard | 0.3091 | 0.2905 | 0.5760 | 0.4478 |
| PF07923 | hard | 0.5226 | 0.5923 | 0.5421 | 0.7611 |
| PF07946 | hard | 0.2451 | 0.4913 | 0.3603 | 0.9068 |
| PF07984 | hard | 0.3622 | 0.4788 | 0.8234 | 0.9205 |
| PF08070 | hard | 0.4293 | 0.6160 | 0.4319 | 0.8125 |
| PF08310 | hard | 0.4098 | 0.5747 | 0.6416 | 0.8174 |
| PF08381 | hard | 0.5040 | 0.4511 | 0.3667 | 0.8934 |
| PF08401 | hard | 0.2266 | 0.2761 | 0.3065 | 0.3298 |
| PF08403 | hard | 0.2285 | 0.2207 | 0.2301 | -      |
| PF08586 | hard | 0.5533 | 0.5999 | 0.7779 | 0.9082 |
| PF08691 | hard | 0.6060 | 0.6408 | 0.6124 | 0.7547 |
| PF08740 | hard | 0.7252 | 0.6780 | 0.5187 | 0.8254 |



|         |      |        |        |        |        |
|---------|------|--------|--------|--------|--------|
| PF09135 | hard | 0.1664 | 0.2516 | 0.1877 | -      |
| PF09356 | hard | 0.2504 | 0.2639 | 0.2015 | 0.3797 |
| PF09369 | hard | -      | 0.3192 | 0.3138 | 0.9772 |
| PF09429 | hard | 0.2706 | 0.4826 | 0.4237 | 0.7126 |
| PF09432 | hard | 0.4447 | 0.5336 | 0.4498 | 0.9027 |
| PF09684 | hard | 0.6742 | 0.6784 | 0.6937 | 0.7482 |
| PF09766 | hard | 0.4528 | 0.5250 | 0.4820 | 0.5794 |
| PF09777 | hard | -      | 0.2545 | 0.2515 | 0.3070 |
| PF09931 | hard | 0.3963 | 0.5583 | 0.4198 | 0.9222 |
| PF10074 | hard | -      | 0.5422 | 0.1997 | 0.5018 |
| PF10117 | hard | 0.3187 | 0.4431 | 0.3635 | 0.2889 |
| PF10169 | hard | 0.7596 | 0.6084 | 0.5109 | 0.7615 |
| PF10171 | hard | 0.3442 | 0.3114 | 0.3561 | 0.4667 |
| PF10172 | hard | 0.6110 | 0.7485 | 0.9671 | 0.9045 |
| PF10198 | hard | 0.3006 | 0.5071 | 0.5286 | 0.8928 |
| PF10221 | hard | 0.5208 | 0.6175 | 0.4693 | 0.7887 |
| PF10270 | hard | 0.3739 | 0.4450 | 0.2866 | 0.4094 |
| PF10572 | hard | 0.2248 | 0.2178 | 0.2506 | 0.3100 |
| PF10657 | hard | 0.2503 | 0.4122 | 0.3203 | 0.6363 |
| PF10806 | hard | 0.2303 | 0.3872 | 0.3262 | 0.4885 |
| PF11203 | hard | 0.7656 | 0.7794 | 0.8935 | 0.8156 |
| PF11210 | hard | 0.6199 | 0.6382 | 0.5911 | 0.6491 |
| PF11235 | hard | 0.3829 | 0.2950 | 0.2617 | 0.2854 |
| PF11256 | hard | 0.8021 | 0.7757 | 0.7638 | 0.8915 |
| PF11262 | hard | 0.7123 | 0.5794 | 0.5427 | 0.8452 |
| PF11315 | hard | 0.4915 | 0.5105 | 0.5855 | 0.4957 |
| PF11390 | hard | 0.4179 | 0.4048 | 0.2469 | 0.4276 |
| PF11594 | hard | 0.2889 | 0.4218 | 0.2498 | 0.4786 |

|         |      |        |        |        |        |
|---------|------|--------|--------|--------|--------|
| PF11597 | hard | 0.3447 | 0.5562 | 0.4728 | 0.6129 |
| PF11718 | hard | 0.4601 | 0.5164 | 0.9967 | 0.9622 |
| PF11779 | hard | 0.5069 | 0.4751 | 0.4963 | 0.7192 |
| PF11801 | hard | 0.2501 | 0.2507 | 0.2079 | 0.4286 |
| PF11876 | hard | 0.3861 | 0.3819 | 0.4163 | 0.8578 |
| PF11882 | hard | 0.2930 | 0.3364 | 0.3201 | 0.7587 |
| PF11938 | hard | 0.6197 | 0.6383 | 0.9864 | -      |
| PF11957 | hard | 0.5629 | 0.7072 | 0.5898 | 0.8211 |
| PF12017 | hard | 0.5249 | 0.5453 | 0.4351 | 0.5843 |
| PF12115 | hard | 0.4010 | 0.4594 | 0.3603 | 0.6586 |
| PF12293 | hard | 0.1833 | 0.1943 | 0.1696 | 0.2065 |
| PF12295 | hard | 0.2823 | 0.4632 | 0.3753 | 0.7857 |
| PF12308 | hard | 0.2328 | 0.2552 | 0.2152 | 0.2930 |
| PF12309 | hard | 0.1807 | 0.1756 | 0.2082 | 0.1612 |
| PF12350 | hard | -      | 0.7045 | 0.4892 | 0.9294 |
| PF12357 | hard | 0.2768 | 0.2374 | 0.3320 | 0.6342 |
| PF12378 | hard | 0.4594 | 0.4710 | 0.3419 | 0.5831 |
| PF12410 | hard | 0.6246 | 0.6787 | 0.6281 | 0.8235 |
| PF12432 | hard | -      | 0.2938 | 0.3009 | 0.4044 |
| PF12495 | hard | -      | 0.6417 | 0.9549 | 0.9050 |
| PF12603 | hard | 0.6047 | 0.5161 | 0.7323 | 0.6627 |
| PF12803 | hard | 0.2266 | 0.2862 | 0.1574 | 0.5597 |
| PF12871 | hard | 0.3083 | 0.3030 | 0.3256 | 0.4910 |
| PF12922 | hard | 0.3257 | 0.4011 | 0.4286 | 0.4652 |
| PF12926 | hard | 0.6955 | 0.7260 | 0.5871 | 0.8144 |
| PF13117 | hard | 0.3060 | 0.2201 | 0.3175 | 0.1872 |
| PF13157 | hard | 0.6527 | 0.7404 | 0.6040 | 0.9039 |
| PF13182 | hard | 0.5684 | 0.5259 | 0.4088 | 0.7217 |

|         |      |        |        |        |        |
|---------|------|--------|--------|--------|--------|
| PF13331 | hard | -      | 0.2558 | 0.2670 | 0.5307 |
| PF13339 | hard | 0.4060 | 0.4402 | 0.3963 | 0.5118 |
| PF13827 | hard | 0.7371 | 0.8062 | 0.5678 | 0.8332 |
| PF13843 | hard | 0.3081 | 0.3254 | 0.3141 | 0.3048 |
| PF13862 | hard | 0.3392 | 0.3719 | 0.6303 | 0.5557 |
| PF13864 | hard | 0.4570 | 0.4894 | 0.5294 | 0.5590 |
| PF13868 | hard | 0.2148 | 0.3218 | 0.2777 | 0.4111 |
| PF13992 | hard | 0.2738 | 0.3327 | 0.3002 | 0.2369 |
| PF14051 | hard | 0.5634 | 0.5890 | 0.3314 | 0.7583 |
| PF14260 | hard | 0.5282 | 0.5370 | 0.5284 | 0.7450 |
| PF14393 | hard | 0.7489 | 0.7651 | 0.7246 | 0.8799 |
| PF14423 | hard | 0.3025 | 0.3605 | 0.3258 | 0.5044 |
| PF14484 | hard | 0.5282 | 0.4717 | 0.9284 | 0.8601 |
| PF14585 | hard | 0.4659 | 0.5234 | 0.5126 | 0.5391 |
| PF14687 | hard | 0.3261 | 0.3329 | 0.3577 | 0.5120 |
| PF14738 | hard | 0.4014 | 0.4530 | 0.4826 | 0.7007 |
| PF14777 | hard | 0.6242 | 0.5897 | 0.7371 | 0.8164 |
| PF14798 | hard | 0.1920 | 0.2212 | 0.2843 | 0.2232 |
| PF14837 | hard | 0.2726 | 0.2100 | 0.2315 | 0.3473 |
| PF14838 | hard | 0.6020 | 0.5961 | 0.6336 | 0.5852 |
| PF14960 | hard | -      | 0.3143 | 0.3054 | -      |
| PF15017 | hard | 0.5024 | 0.6108 | 0.5871 | 0.6548 |
| PF15019 | hard | 0.5755 | 0.5352 | 0.5533 | 0.6775 |
| PF15104 | hard | 0.3454 | 0.3308 | 0.4428 | 0.4405 |
| PF15184 | hard | 0.4936 | 0.4569 | 0.4576 | 0.7925 |
| PF15300 | hard | -      | 0.4169 | 0.3936 | 0.4409 |
| PF15387 | hard | 0.3642 | 0.5405 | 0.3964 | 0.7447 |
| PF15448 | hard | -      | 0.3808 | 0.3350 | 0.5466 |

|         |           |        |        |        |        |
|---------|-----------|--------|--------|--------|--------|
| PF15865 | hard      | 0.5389 | 0.6417 | 0.5740 | 0.6013 |
| PF15933 | hard      | -      | 0.5461 | 0.4420 | 0.5681 |
| PF16134 | hard      | 0.3174 | 0.3323 | 0.6039 | 0.8944 |
| PF16192 | hard      | 0.2189 | 0.2712 | 0.7316 | -      |
| PF16234 | hard      | 0.3735 | 0.3829 | 0.3351 | 0.2664 |
| PF16327 | hard      | 0.3429 | 0.3558 | 0.4155 | 0.4474 |
| PF16498 | hard      | 0.3171 | 0.3847 | 0.3613 | 0.5374 |
| PF17081 | hard      | -      | 0.3015 | 0.3442 | -      |
| PF17250 | hard      | 0.7072 | 0.7057 | 0.6179 | 0.7734 |
| PF18145 | hard      | 0.3733 | 0.3447 | 0.2641 | 0.4587 |
| PF18755 | hard      | 0.3199 | 0.4593 | 0.3757 | 0.6092 |
| PF00872 | very hard | 0.4314 | 0.7228 | 0.5503 | 0.8092 |
| PF01677 | very hard | 0.6906 | 0.7181 | 0.6738 | 0.7772 |
| PF02107 | very hard | 0.3811 | 0.3329 | 0.2963 | 0.3874 |
| PF02119 | very hard | 0.7819 | 0.8369 | 0.7608 | 0.9137 |
| PF03113 | very hard | -      | 0.4917 | 0.3035 | 0.4429 |
| PF03257 | very hard | 0.2820 | 0.2970 | 0.3127 | 0.6676 |
| PF03381 | very hard | 0.3951 | 0.4484 | 0.3579 | 0.6667 |
| PF03396 | very hard | 0.3620 | 0.3240 | 0.3542 | 0.3879 |
| PF03509 | very hard | 0.5927 | 0.5952 | 0.5688 | 0.6618 |
| PF03700 | very hard | 0.4779 | 0.2551 | 0.4058 | 0.9200 |
| PF03839 | very hard | 0.4389 | 0.4237 | 0.2045 | 0.5349 |
| PF04081 | very hard | 0.4649 | 0.4896 | 0.3420 | 0.4771 |
| PF04281 | very hard | 0.3028 | 0.3193 | 0.3018 | 0.3558 |
| PF04295 | very hard | 0.4126 | 0.4200 | 0.1787 | 0.7342 |
| PF04776 | very hard | 0.2895 | 0.4881 | 0.3444 | 0.7843 |
| PF05348 | very hard | 0.4718 | 0.6035 | 0.5661 | 0.5803 |
| PF05422 | very hard | -      | 0.3145 | 0.3441 | 0.8370 |

|         |           |        |        |        |        |
|---------|-----------|--------|--------|--------|--------|
| PF05518 | very hard | 0.2268 | 0.2367 | 0.2567 | 0.4161 |
| PF05831 | very hard | 0.4794 | 0.3714 | 0.4830 | 0.7596 |
| PF06138 | very hard | 0.4774 | 0.5646 | 0.4848 | 0.6357 |
| PF07314 | very hard | 0.2944 | 0.2566 | 0.3864 | 0.8824 |
| PF07365 | very hard | 0.3544 | 0.3506 | 0.2929 | -      |
| PF07774 | very hard | 0.4079 | 0.2988 | 0.4048 | 0.8239 |
| PF07982 | very hard | -      | 0.2829 | 0.2502 | 0.3892 |
| PF08039 | very hard | 0.4485 | 0.4564 | 0.4722 | 0.5505 |
| PF10216 | very hard | -      | 0.2744 | 0.1987 | 0.7174 |
| PF10744 | very hard | 0.3445 | 0.3172 | 0.3375 | 0.7752 |
| PF11289 | very hard | 0.3128 | 0.3350 | 0.2602 | 0.3743 |
| PF11704 | very hard | 0.4487 | 0.4390 | 0.4020 | 0.4301 |
| PF11711 | very hard | 0.3129 | 0.3954 | 0.3413 | 0.4380 |
| PF12409 | very hard | 0.3770 | 0.4738 | 0.5610 | 0.6216 |
| PF12546 | very hard | -      | 0.5967 | 0.4753 | 0.4787 |
| PF13299 | very hard | 0.5477 | 0.5520 | 0.3001 | 0.5623 |
| PF13330 | very hard | 0.1875 | 0.2180 | 0.2001 | 0.2649 |
| PF14487 | very hard | -      | 0.1566 | 0.1360 | 0.1074 |
| PF14637 | very hard | 0.5659 | 0.5598 | 0.5735 | 0.8721 |
| PF14638 | very hard | 0.6489 | 0.7115 | 0.5592 | 0.9077 |
| PF14665 | very hard | 0.2567 | 0.3732 | 0.3111 | 0.6377 |
| PF14728 | very hard | 0.5799 | 0.6450 | 0.5635 | 0.7912 |
| PF14782 | very hard | 0.6983 | 0.7635 | 0.6909 | 0.9366 |
| PF14892 | very hard | 0.4806 | 0.5899 | 0.4564 | 0.8096 |
| PF14939 | very hard | 0.7904 | 0.8499 | 0.7393 | 0.7667 |
| PF15014 | very hard | 0.4570 | 0.4260 | 0.4146 | 0.4159 |
| PF15097 | very hard | 0.3228 | 0.3044 | 0.2834 | 0.1840 |
| PF15122 | very hard | 0.2539 | 0.2577 | 0.2923 | 0.2071 |

|         |           |        |        |        |        |
|---------|-----------|--------|--------|--------|--------|
| PF15146 | very hard | 0.4357 | 0.5317 | 0.2524 | 0.7537 |
| PF15693 | very hard | 0.5007 | 0.5151 | 0.4302 | 0.6577 |
| PF15694 | very hard | 0.7206 | 0.7120 | 0.6166 | 0.8197 |
| PF16500 | very hard | -      | 0.3584 | 0.3648 | 0.3846 |
| PF16564 | very hard | 0.3551 | 0.2433 | 0.2343 | 0.4087 |
| PF16932 | very hard | 0.7606 | 0.7547 | 0.7080 | 0.7647 |
| PF17229 | very hard | 0.5695 | 0.5841 | 0.5524 | 0.5744 |

a 24 families with missing scores were not modelled in the original DMPfold1 publication.  
b 12 families had overlap with the AlphaFold2 training set and were excluded.

**Table S5. CATH assignment of BFD models.** The number of models assigned to each CATH class and not assigned to a CATH class are shown, along with the number of superfamilies present in each class in CATH.

| <b>Class</b> | <b>No. Superfamilies</b> | <b>% of Total</b> | <b>No. Models Assigned</b> | <b>% of Total</b> |
|--------------|--------------------------|-------------------|----------------------------|-------------------|
|              | 945                      | 39.46             | 11,891                     | 35.44             |
| <b>2</b>     | 451                      | 18.83             | 3,495                      | 10.42             |
| <b>3</b>     | 962                      | 40.17             | 8,035                      | 23.95             |
| <b>4</b>     | 4                        | 0.17              | 6                          | 0.02              |
| <b>6</b>     | 32                       | 1.34              | 68                         | 0.20              |
| <b>None</b>  |                          |                   | 10,053                     | 29.97             |
|              |                          |                   |                            |                   |
| <b>Total</b> | 2,395                    |                   | 33,548                     |                   |
